# Supplementary material for: Effects of fluorescent glutamate indicators on neurotransmitter diffusion and uptake
Source: eLife. 2020 Apr 30;9:e54441. doi: 10.7554/eLife.54441 (PMC7255799; doi:10.7554/eLife.54441)
Supplement: Figure 1—source data 1. — Steady-state amplitudes of simulated responses to glutamate application (Figure 1B). Calculated Kd values and measure deactivation time constants (Figure 1C). Mean and SD calculated from responses to all glutamate concentrations. [file elife-54441-fig1-data1.xlsx]

## Sheet: Figure 1B
Source Data
[glu]	iGluSnFR	iGluf	iGluu	EAAT
1e-06	0.017287	0.00455327	0.00044989	0.00752862
3e-06	0.0523956	0.0150267	0.00112306	0.0221572
1e-05	0.160607	0.0467928	0.00386087	0.0644323
3e-05	0.359503	0.126007	0.0115391	0.135794
0.0001	0.60947	0.309665	0.0316988	0.221779
0.0003	0.739889	0.520199	0.0753722	0.273643
0.001	0.805603	0.677644	0.140615	0.296293
0.003	0.830165	0.734108	0.187892	0.302051
0.01	0.832852	0.757138	0.207971	0.305996
0.03	0.837116	0.763605	0.220741	0.306546

## Sheet: Figure 1C
Source Data
	Kd (M)	τ off mean	τ off SD
iGluSnFR	4e-05	9.996	0.176
iGluf	0.000146	5.18	0.071
iGluu	0.000588	2.47	0.077
EAAT	3.78e-05	3.211	0.028
