# Supplementary material for: Effects of fluorescent glutamate indicators on neurotransmitter diffusion and uptake
Source: eLife. 2020 Apr 30;9:e54441. doi: 10.7554/eLife.54441 (PMC7255799; doi:10.7554/eLife.54441)
Supplement: Figure 2—source data 1. — Measured decay time constants of simulated STCs and iGluSnFR signals (Figure 2D). Median diffusion distance of glutamate molecules and the average number of times that each glutamate molecule bound to an iGluSnFR molecule prior to being taken up (Figure 2F). Data from a single simulation at each iGluSnFR concentration. [file elife-54441-fig2-data1.xlsx]

## Sheet: Figure 2D
Source Data
	[iGluSnFR]	τ STC (ms)	τ iGlu (ms)
	1e-06	4.055	9.29
	3e-06	4.18	10.8
	1e-05	4.5	10.48
	3e-05	5.64	11.74
	0.0001	10.21	15.9
	0.0003	26.6	22.09
	0.001	62.32	63.45
	0.003	168.1	167.2

## Sheet: Figure 2F
Source Data
	[iGluSnFR]	r 1/2	touches
	1e-06	0.787	0.0466
	3e-06	0.78	0.1632
	1e-05	0.75	0.4722
	3e-05	0.769	1.49
	0.0001	0.769	4.966
	0.0003	0.774	15.24
	0.001	0.743	49.7
	0.003	0.734	152.9
