# Supplementary material for: Effects of fluorescent glutamate indicators on neurotransmitter diffusion and uptake
Source: eLife. 2020 Apr 30;9:e54441. doi: 10.7554/eLife.54441 (PMC7255799; doi:10.7554/eLife.54441)
Supplement: Figure 3—source data 1. — Peak [glu] within the center of the synaptic cleft (110 nm) (Figure 3Aii). Peak [glu] in the perisynaptic region (160–260 nm from release site) (Figure 3Bii). Peak [glu] in a neighboring synapse (400–500 nm from release site) (Figure 3Cii). [file elife-54441-fig3-data1.xlsx]

## Sheet: Figure 3Aii
Source Data
cleft
[iGluSnFR]	[glu] (mM)
1e-06	10.921
3e-06	10.921
1e-05	10.921
3e-05	10.921
0.0001	10.921
0.0003	10.921
0.001	10.921
0.003	10.921

## Sheet: Figure 3Bii
Source Data
peri
[iGluSnFR]	[glu] (μM)
1e-06	76.581
3e-06	76.95
1e-05	77.3751
3e-05	74.5146
0.0001	74.5545
0.0003	69.039
0.001	56.345
0.003	34.0716

## Sheet: Figure 3Cii
Source Data
NND
[iGluSnFR]	[glu] (μM)
1e-06	6.07
3e-06	6
1e-05	5.9
3e-05	5.5
0.0001	4.4
0.0003	2.9
0.001	0.88
0.003	0.13
