# Supplementary material for: Effects of fluorescent glutamate indicators on neurotransmitter diffusion and uptake
Source: eLife. 2020 Apr 30;9:e54441. doi: 10.7554/eLife.54441 (PMC7255799; doi:10.7554/eLife.54441)
Supplement: Figure 4—source data 1. — Measured STC rise and decay values from tdTomato+ and iGluSnFR+ astrocytes (Figure 4D). Measured steady-state membrane potentials recorded under current clamp from tdTomato+ and iGluSnFR+ astrocytes (Figure 4E). STC decay data from astrocytes in singly and doubly infected slices, normalized to the average control STC decay in each case (Figure 4G). iGluSnFR signal decay data from astrocytes in singly and doubly infected slices, normalized to the average control STC decay in each case (Figure 4H). [file elife-54441-fig4-data1.xlsx]

## Sheet: Figure 4D
Source Data
	Rise:		Decay:
	iGluSnFr	tdTomato	iGluSnFr	tdTomato
Average:	6.65	5.03333	19.2454	16.0478
SE:	0.354372	0.550296	1.17995	0.936505
Raw Data	6.7	5.4	15.2481	17.809
	6.7	5.6	16.895	20.6408
	5.8	4.5	19.3545	18.7938
	5.7	9	18.235	22.0105
	7.8	5.8	20.63	18.5249
	8.9	2.3	31.5226	11.7872
	6.9	3.2	17.9938	13.77
	6.4	4.8	15.3925	14.4294
	5.1	3.8	13.5322	13.81
	6.8	3.4	15.4765	11.4868
	4.9	3.4	14.8931	15.6834
	7.1	3.1	16.1918	12.2553
	7.1	8.1	28.141	16.5839
	6.5	4.2	13.1291	11.8949
	5.7	8.9	11.6144	21.2372
	6		11.4049
	6.2		21.808
	4.4		21.9118
	4.8		20.2592
	5.1		18.4601
	4.9		29.7573
	11.4		25.2304
	10.5		25.5618
	8.2

## Sheet: Figure 4E
Source Data
	iGluSnFr		tdTomato			iGluSnFr
Current (pA)	Average	SE	Average	SE		Raw																							tdTomato
																													Raw
-150	-77.3542	0.62206	-74.882	1.50019		-83.1909	-82.3863	-75.868	-74.8117	-78.0635	-77.0471	-77.2241	-77.8071	-75.7563	-80.6172	-72.9549	-79.1623	-78.1854	-73.6463	-74.2613	-75.8199	-75.7408	-78.4989	-81.2846	-78.145	-73.9674			-67.1714	-66.5618	-71.5628	-69.9173	-71.4439	-77.1116	-74.6422	-72.2576	-88.5637	-75.0383	-81.271	-78.5184	-71.6801	-80.0074	-77.4827
-130	-76.8278	0.57672	-74.1905	1.42552		-82.5681	-81.8514	-75.6117	-74.4348	-77.813	-76.605	-76.0011	-77.3714	-75.3516	-79.0827	-72.5948	-78.788	-77.9274	-73.9518	-73.9087	-75.5311	-75.3196	-78.0919	-79.8653	-77.1141	-73.6007			-66.3927	-65.7348	-71.2044	-69.4015	-71.1828	-76.7982	-74.2646	-71.9081	-86.4995	-74.7682	-80.2338	-77.9174	-71.1975	-79.4094	-75.944
-110	-76.2731	0.54828	-73.5231	1.36078		-81.9307	-81.2687	-75.3461	-74.01	-77.4277	-76.1804	-74.6903	-76.8712	-75.0073	-77.7297	-72.272	-78.4064	-77.6858	-73.6583	-73.5886	-75.2769	-74.9445	-77.7575	-78.4064	-76.0397	-73.2374			-65.725	-64.8656	-70.8164	-68.9847	-71.0061	-76.4669	-73.8591	-71.5561	-84.4479	-74.5402	-79.3715	-77.3322	-70.6582	-78.8274	-74.39
-90	-75.7062	0.52677	-72.8579	1.29764		-81.1884	-80.5962	-75.0319	-73.688	-77.1173	-75.7337	-73.3198	-76.4401	-74.5459	-76.3074	-71.9795	-78.0238	-77.4108	-73.4883	-73.2363	-74.9945	-74.6031	-77.4268	-76.939	-74.8949	-72.8656			-65.069	-64.1752	-70.3818	-68.5294	-70.708	-76.1406	-73.4719	-71.1883	-82.3882	-74.2389	-78.4079	-76.7585	-70.3008	-78.228	-72.8821
-70	-75.1273	0.52537	-72.1583	1.25209		-80.4622	-79.8904	-74.7718	-73.3502	-76.8428	-75.266	-71.8432	-76.0048	-74.2307	-74.9668	-71.7045	-77.6487	-77.1515	-72.798	-72.8765	-74.7376	-74.2219	-77.0839	-75.4736	-73.8554	-72.4916			-64.3893	-63.3932	-70.019	-68.009	-70.4991	-75.8461	-73.0768	-70.8395	-80.4008	-73.9398	-77.3381	-76.1856	-69.6451	-77.6224	-71.17
-50	-74.5456	0.53844	-71.5095	1.21336		-79.8229	-79.2192	-74.3886	-72.9572	-76.439	-74.8193	-70.5066	-75.4776	-73.8205	-73.6609	-71.4388	-77.2255	-76.9742	-72.0803	-72.4959	-74.4677	-73.8629	-76.7477	-74.117	-72.8008	-72.1346			-63.6865	-62.733	-69.6199	-67.4843	-70.0966	-75.5169	-72.7251	-70.4896	-78.3691	-73.8195	-76.3029	-75.6129	-69.3714	-77.0553	-69.7594
-30	-73.9762	0.55947	-70.8093	1.18616		-79.152	-78.5276	-74.0637	-72.565	-76.15	-74.369	-69.1944	-75.0369	-73.4393	-72.2717	-71.2241	-76.8533	-76.6135	-71.4209	-72.13	-74.2285	-73.4964	-76.3975	-72.7946	-71.7769	-71.7942			-63.0312	-62.1097	-69.2616	-66.9505	-69.8502	-75.2195	-72.2913	-70.1043	-76.1948	-73.4729	-75.3333	-74.9916	-68.654	-76.5539	-68.1202
-10	-73.4137	0.58347	-70.1243	1.16421		-78.4355	-77.8252	-73.6779	-72.2741	-75.7683	-73.7048	-67.8884	-74.5784	-72.9688	-70.9038	-70.9736	-76.4662	-76.3817	-71.3832	-71.7695	-73.9456	-73.081	-76.0231	-71.4138	-70.779	-71.446			-62.4617	-61.5167	-68.8499	-66.4716	-69.4583	-74.8203	-71.8915	-69.7321	-74.1275	-73.0259	-74.3572	-74.3941	-68.2225	-75.9717	-66.5631
10	-72.8243	0.62533	-69.4739	1.1596		-77.701	-77.1484	-73.2891	-71.9109	-75.3253	-73.314	-66.5263	-74.1221	-72.5119	-69.5513	-70.705	-76.0651	-76.1402	-70.8428	-71.3695	-73.669	-72.689	-75.7059	-69.9271	-69.7591	-71.0369			-61.9194	-60.9314	-68.4832	-65.8715	-69.2772	-74.4733	-71.5121	-69.3435	-72.1838	-72.7816	-73.3907	-73.7641	-67.7746	-75.3585	-65.044
30	-72.2472	0.67445	-68.7961	1.1669		-76.9807	-76.4394	-72.9924	-71.4695	-75.0701	-72.9367	-65.2261	-73.6148	-72.1627	-68.2496	-70.3881	-75.6517	-75.9183	-70.0874	-71.0241	-73.41	-72.2214	-75.3577	-68.4507	-68.7921	-70.7481			-61.3318	-60.377	-68.0165	-65.2505	-69.0623	-74.105	-71.1199	-69.006	-70.0522	-72.4583	-72.3736	-73.1621	-67.3659	-74.7582	-63.5017
50	-71.675	0.72592	-68.095	1.18998		-76.2634	-75.7448	-72.6151	-71.1191	-74.5885	-72.5409	-63.8801	-73.1775	-71.82	-66.9884	-70.1747	-75.2856	-75.623	-69.6325	-70.6376	-73.1157	-71.8517	-74.9986	-67.0054	-67.7379	-70.374			-60.6322	-59.8132	-67.5026	-64.5797	-68.784	-73.749	-70.6805	-68.6298	-68.0796	-72.1437	-71.3245	-72.5284	-66.9596	-74.0585	-61.9601
70	-71.0926	0.78264	-67.4303	1.22506		-75.4983	-74.9657	-72.3161	-70.7775	-74.2808	-72.1708	-62.5791	-72.6682	-71.4125	-65.6514	-69.834	-74.8722	-75.3766	-69.077	-70.2751	-72.8632	-71.4172	-74.6153	-65.553	-66.7673	-69.9723			-60.0898	-59.2412	-67.1809	-64.0192	-68.5119	-73.3846	-70.2165	-68.227	-66.0485	-71.7928	-70.4743	-71.926	-66.4404	-73.4941	-60.4068
90	-70.5264	0.84238	-66.728	1.26902		-74.731	-74.2759	-72.0063	-70.414	-73.8426	-71.7991	-61.279	-72.2337	-71.1281	-64.333	-69.6104	-74.4756	-75.1108	-68.7307	-69.9199	-72.5518	-71.0134	-74.2171	-64.1107	-65.7059	-69.5665			-59.5239	-58.6437	-66.6902	-63.2909	-68.2182	-73.0041	-69.7821	-67.82	-63.9898	-71.3907	-69.4357	-71.3281	-66.1683	-72.7911	-58.8425
110	-69.9508	0.90816	-66.0377	1.31462		-73.9743	-73.5479	-71.7143	-70.0152	-73.5621	-71.4271	-60.096	-71.8142	-70.7064	-62.9293	-69.3341	-74.0819	-74.8601	-68.25	-69.4871	-72.3027	-70.6278	-73.8162	-62.5451	-64.7144	-69.1603			-58.9507	-58.178	-66.2397	-62.8217	-67.8227	-72.5636	-69.4014	-67.3961	-62.0006	-71.0501	-68.3367	-70.7919	-65.5469	-72.1031	-57.3618
130	-69.3753	0.97442	-65.3514	1.38329		-73.2131	-72.833	-71.4459	-69.5287	-73.2127	-71.0737	-58.8276	-71.3886	-70.3129	-61.5919	-69.0188	-73.6738	-74.6056	-67.8887	-69.1432	-72.0435	-70.1867	-73.3946	-61.0904	-63.7039	-68.7038			-58.4526	-57.4271	-65.7893	-62.374	-67.5773	-72.2465	-68.949	-66.9593	-59.9924	-70.915	-67.3297	-70.0189	-65.0359	-71.437	-55.7672
150	-68.7838	1.04648	-64.66	1.44835		-72.4779	-72.1307	-71.1273	-69.2146	-72.8039	-70.6853	-57.5155	-70.9027	-69.7936	-60.1329	-68.7008	-73.3015	-74.3693	-67.113	-68.8046	-71.7847	-69.7561	-73.0504	-59.6746	-62.7312	-68.39			-57.8758	-56.9535	-65.2988	-61.7234	-67.3175	-71.8417	-68.553	-66.4842	-57.9112	-70.6487	-66.2023	-69.3111	-64.7215	-70.7277	-54.33
170	-68.2077	1.11574	-63.9882	1.51994		-71.724	-71.4131	-70.842	-68.8135	-72.4261	-70.26	-56.1954	-70.4214	-69.4212	-58.8437	-68.3238	-72.8794	-74.1314	-66.7788	-68.424	-71.5324	-69.3508	-72.6108	-58.1689	-61.8082	-67.9927			-57.3436	-56.6009	-64.856	-61.1109	-66.9154	-71.4958	-68.1112	-66.0402	-55.8325	-70.2819	-65.187	-68.7293	-64.5093	-69.9951	-52.8145
190	-67.5956	1.19439	-63.3082	1.60195		-70.9983	-70.5081	-70.4579	-68.395	-72.1094	-69.8615	-54.8192	-69.8918	-68.9826	-57.435	-68.0623	-72.4776	-73.8957	-66.1575	-68.098	-71.2586	-68.9583	-72.2195	-56.5477	-60.7906	-67.5819			-56.7505	-55.975	-64.3535	-60.5009	-66.5771	-71.0857	-67.6834	-65.624	-53.7991	-69.9095	-64.2503	-68.1316	-64.2873	-69.3149	-51.3798
210	-67.0311	1.25549	-62.6247	1.6669		-70.2407	-69.5754	-70.1226	-67.9682	-71.7468	-69.4361	-53.4742	-69.4221	-68.5725	-56.2985	-67.8459	-72.0444	-73.6228	-65.6665	-67.7655	-70.9924	-68.57	-71.8022	-55.3389	-59.9243	-67.223			-55.9711	-55.5119	-63.8575	-59.9322	-66.2058	-70.6322	-67.3289	-65.1464	-51.7734	-69.5537	-63.1997	-67.5852	-63.8444	-68.4033	-50.4241
230	-66.4464	1.33109	-61.8807	1.76508		-69.4659	-68.761	-69.8054	-67.3941	-71.3747	-69.0242	-51.9651	-68.9837	-68.2559	-55.0569	-67.5639	-71.7089	-73.4122	-65.2643	-67.396	-70.7271	-68.1881	-71.3602	-54.0013	-58.8853	-66.7798			-55.5864	-54.8777	-63.3575	-59.1588	-65.8578	-70.323	-66.8753	-64.7241	-49.8161	-69.2367	-62.2415	-66.8622	-63.3181	-67.4449	-48.5297

## Sheet: Figure 4G
Source Data
		Single Infection	Double Infection
	Average:	1.19925	1.57098
	SE:	0.07353	0.13058
	Raw	0.95017	1.76795
		1.05279	0.99695
		1.20605	1.03285
		1.13629	1.15914
		1.28554	1.68522
		1.9643	1.12322
		1.12126	1.30459
		0.95917	1.39045
		0.84324	1.91899
		0.9644	2.22235
		0.92805	0.32417
		1.00898	1.65126
		1.75357	1.30501
		0.81813	1.78013
		0.72374	1.18512
		0.71069	1.40044
		1.35894	1.64926
		1.36541	2.88639
		1.26243	2.52185
		1.15032	2.11429
		1.85429
		1.57221
		1.59286

## Sheet: Figure 4H
Source Data
		Infection
		Single	Double
	Average:	21.0848	53.0105
	SD:	4.94235	32.2182
	Raw	14.7779	39.1989
		25.0613	29.9006
		16.7322	29.7932
		18.4902	106.316
		17.5589	59.8435
		22.0081
		26.5841
		17.8389
		21.5288
		30.2672
	τ con STC	16.0478	10.0211
	Normalized	0.920869	3.91163
		1.56167	2.98376
		1.04265	2.97305
		1.1522	10.6092
		1.09416	5.97175
		1.37141
		1.65656
		1.11161
		1.34154
		1.88606
	Norm ave	1.31387	5.28988
	Norm SD	0.307977	3.21504
