# Supplementary material for: Effects of fluorescent glutamate indicators on neurotransmitter diffusion and uptake
Source: eLife. 2020 Apr 30;9:e54441. doi: 10.7554/eLife.54441 (PMC7255799; doi:10.7554/eLife.54441)
Supplement: Figure 5—source data 1. — Simulated iGluSnFR signal decay time constants measured across different ROI radii and at different iGluSnFR concentrations (Figure 5B). Peak iGluSnFR signals vs. iGluSnFR concentration (Figure 5C). iGluSnFR response variability (CV) vs. iGluSnFR concentration (Figure 5D). Simulated peak iGluSnFR ΔF/F values (single synapse) across different ROI radii and at different iGluSnFR concentrations (Figure 5F). Simulated peak iGluSnFR ΔF/F values (multiple synapses) across different ROI radii and at different iGluSnFR concentrations (Figure 5G). Fraction of iGluSnFR bound within a 0.5 μm radius ROI vs. iGluSnFR concentration (Figure 5H). [file elife-54441-fig5-data1.xlsx]

## Sheet: Figure 5B
Source Data
		[iGluSnFR (M)
	radius	0.003	0.001	0.0003	0.0001	3e-05	1e-05	3e-06	1e-06
	0.5	40.5278	22.1414	15.1337	11.9003	12.3648	11.0915	9.6207	11.4076
	1	126.612	40.5752	19.5416	13.579	12.6772	12.3963	15.6911	14.0141
	2	169.369	65.2902	26.1792	15.7582	12.7896	12.972	15.5831	13.4871
	5	186.157	64.5968	28.0404	16.5464	13.2279	13.1764	17.8846	13.1033
	10	186.157	64.5968	28.0386	16.5449	13.2304	13.2157	17.8846	12.8977
	25	186.157	64.5968	28.0386	16.5449	13.2304	13.2157	17.8846	12.8977
	50	186.157	64.5968	28.0386	16.5449	13.2304	13.2157	17.8846	12.8977
	100	186.157	64.5968	28.0386	16.5449	13.2304	13.2157	17.8846	12.8977

## Sheet: Figure 5C
Source Data
	[iGluSnFR]	peak
	1e-06	14.1
	3e-06	42
	1e-05	132.2
	3e-05	374.2
	0.0001	1042.7
	0.0003	2048.8
	0.001	3162.5
	0.003	3769.9
	0.01	4101.7

## Sheet: Figure 5D
Source Data
	[iGluSnFR]	CV
	1e-06	24.5
	3e-06	14.9
	1e-05	7.02
	3e-05	4.8
	0.0001	2.26
	0.0003	1.58

## Sheet: Figure 5F
Source Data
		[iGluSnFR] (M)
	radius (μm)	1e-06	3e-06	1e-05	3e-05	0.0001	0.0003	0.001	0.003
	0.5	0.0497965	0.0551565	0.0444019	0.0442981	0.0411858	0.0356875	0.0316301	0.01095
	1	0.0132872	0.0134971	0.0120655	0.0117003	0.0101763	0.00759511	0.00402457	0.00157398
	2	0.00238437	0.00232424	0.0020628	0.00196162	0.00163675	0.00108842	0.000501314	0.000196742
	5	0.000162561	0.000152359	0.000137274	0.000128979	0.000106217	6.98997e-05	3.20687e-05	1.25855e-05
	10	2.03196e-05	1.90444e-05	1.71588e-05	1.61219e-05	1.32767e-05	8.73721e-06	4.00848e-06	1.57314e-06
	25	1.30045e-06	1.21884e-06	1.09816e-06	1.0318e-06	8.49707e-07	5.5918e-07	2.56542e-07	1.0068e-07
	50	1.62556e-07	1.52354e-07	1.3727e-07	1.28975e-07	1.06213e-07	6.98974e-08	3.20677e-08	1.2585e-08
	100	2.03195e-08	1.90443e-08	1.71587e-08	1.61218e-08	1.32767e-08	8.73718e-09	4.00846e-09	1.57313e-09

## Sheet: Figure 5G
Source Data
		[iGluSnFR] (M)
	radius (μm)	1e-06	3e-06	1e-05	3e-05	0.0001	0.0003	0.001	0.003
	0.5	0.0127186	0.0256593	0.0284212	0.0228795	0.022826	0.0212223	0.0183891	0.0162984
	1	0.0279544	0.0563969	0.0572878	0.0512116	0.0496613	0.0431931	0.0322371	0.0170821
	2	0.0402756	0.0812543	0.0792051	0.0702957	0.0668477	0.0557768	0.037091	0.0170837
	5	0.0429253	0.0866	0.0811652	0.0731289	0.0687098	0.056584	0.0372371	0.0170837
	10	0.0429253	0.0866	0.0811652	0.0731289	0.0687098	0.056584	0.0372371	0.0170837
	25	0.0429253	0.0866	0.0811652	0.0731289	0.0687098	0.056584	0.0372371	0.0170837
	50	0.0429253	0.0866	0.0811652	0.0731289	0.0687098	0.056584	0.0372371	0.0170837
	100	0.0429253	0.0866	0.0811652	0.0731289	0.0687098	0.056584	0.0372371	0.0170837

## Sheet: Figure 5H
Source Data
	[iGlu] (M)	% bound
	1e-06	3.41663
	3e-06	3.09311
	1e-05	3.0789
	3e-05	2.88326
	0.0001	2.5946
	0.0003	1.89947
	0.001	0.995281
	0.003	0.411176
	0.01	0.133565
	0.03	0.0458846
