# Supplementary material for: Effects of fluorescent glutamate indicators on neurotransmitter diffusion and uptake
Source: eLife. 2020 Apr 30;9:e54441. doi: 10.7554/eLife.54441 (PMC7255799; doi:10.7554/eLife.54441)
Supplement: Figure 6—source data 1. — iGluSnFR signal decay time constants over a range of EAAT concentrations at three different ROI sizes (Figure 6D). Uptake time constants over a range of EAAT concentrations with 300 μM iGluSnFR and 0 iGluSnFR (Figure 6E). Comparison of iGluSnFR signal decay (5 μm ROI) and uptake time course (Figure 6F). [file elife-54441-fig6-data1.xlsx]

## Sheet: Figure 6D
Source Data
		ROI radius (μm)
	[EAAT] (M)	1	2	5
	0	37.3	88.2	617.7
	1e-06	34.5	79.4	762.4
	3e-06	33.32	79.58	535.3
	1e-05	31.9	66	173.7
	3e-05	25.8	45.5	67.7
	0.0001	19.3	24.8	26.9
	0.0003	15	16.2	16.2

## Sheet: Figure 6E
Source Data
		τ uptake (ms)
	[EAAT] (M)	0 iGluSnFR	300 μM iGlu
	1e-06	152.7	759.6
	3e-06	64.4	664.9
	1e-05	20.4	178.6
	3e-05	7.68	66
	0.0001	4.42	18.4
	0.0003	3.68	8.25

## Sheet: Figure 6F
Source Data
	iGlu decay	τ uptake (ms)
	762.4	759.6
	535.3	664.9
	173.7	178.6
	67.7	66
	26.9	18.4
	16.2	8.25
