# Supplementary material for: Effects of fluorescent glutamate indicators on neurotransmitter diffusion and uptake
Source: eLife. 2020 Apr 30;9:e54441. doi: 10.7554/eLife.54441 (PMC7255799; doi:10.7554/eLife.54441)
Supplement: Figure 8—source data 1. — Peak indicator responses, normalized to the single synapse response, for iGluSnFR, iGluf, and iGluu (Figure 8G). Response variability (CV, 1/CV2), versus the number of activated synapses (Figure 8H). Comparison of iGluSnFR response amplitude over a range of ROIs with and without an explicit synaptic structure (Figure 8—figure supplement 1B). Comparison of iGluSnFR response decay over a range of ROIs with and without an explicit synaptic structure (Figure 8—figure supplement 1C). [file elife-54441-fig8-data1.xlsx]

## Sheet: Figure 8G
Source Data
		response (norm)
	# synapses	iGluSnFR	iGluf	iGluu
	1	1	1	1
	3	3.04	3.03	2.99
	7	7.13	7.17	7.02
	15	15.56	15.94	15.3

## Sheet: Figure 8H
Source Data
	# synapses	CV	1/CV2
	1	7.02	0.020292
	3	3.77	0.0703586
	7	2.47	0.16391
	15	1.98	0.255076

## Sheet: fig supp 1B
Source Data
		peak amplitude
	ROI (μm)	cleft	point source
	0.5	920.4	1033
	1	1764	1798
	2	2069	2080
	5	2079	2087
	10	2079	2087

## Sheet: fig supp 1C
Source Data
		τ decay (ms)
	ROI (μm)	cleft	point source
	0.5	14.75	15.2
	1	19.18	19.6
	2	25.7	25.8
	5	27.4	27.7
	10	27.4	27.7
