# Supplementary material for: Effects of fluorescent glutamate indicators on neurotransmitter diffusion and uptake
Source: eLife. 2020 Apr 30;9:e54441. doi: 10.7554/eLife.54441 (PMC7255799; doi:10.7554/eLife.54441)
Supplement: Figure 10—source data 1. — Steady-state simulated responses of FrankenSnFR to different glutamate concentrations (Figure 10C). [file elife-54441-fig10-data1.xlsx]

## Sheet: Figure 10C
Source Data
	[glu] (M)	steady state
	1e-06	0.0408368
	3e-06	0.118514
	1e-05	0.289268
	3e-05	0.493733
	0.0001	0.657792
	0.0003	0.721634
	0.001	0.749716
	0.003	0.756838
	0.01	0.766309
	0.03	0.767944
